# Supplementary material for: Risk Factors for the Occurrence and Protraction of Anterior Knee Pain in Children and Adolescents: a Prospective Cohort Study of 3 Years
Source: Research Square preprint supplement (doi:10.21203/rs.3.rs-1095827/v1), 2021-12-13
Supplement: Supplementary file 1 [file 9ad0cb2ac823f91a7203ca52.xlsx]

## Sheet: Table 4
The OR and CI of the protraction of AKP by each factor
	Rt AKP			Lt AKP
	OR	95% CI	P value	OR	95% CI	P value
Age (y) a
9	1.21	0.58 – 2.53	0.608	1.02	0.46 – 2.25	0.966
10	1.7	0.81 – 3.59	0.161	1.36	0.64 – 2.89	0.432
11	2.46	1.00 – 6.06	0.051	1.3	0.58 – 2.91	0.522
12	1.07	0.58 – 1.96	0.84	0.86	0.44 – 1.66	0.653
13	2.37	1.00 – 5.61	0.05	1.65	0.70 – 3.87	0.253
14	2.57	1.00 – 6.60	0.049	6.32	1.33 – 30.00	0.02
Rt HBD (non-contact group ) b	0.91	0.22 – 3.82	0.902	0.83	0.15 – 4.45	0.825
Lt HBD (non-contact group ) b	1.24	0.30 – 5.10	0.762	1.25	0.23 – 6.73	0.797
Rt SLRA c	0.78	0.49 – 1.23	0.285	0.75	0.48 – 1.17	0.204
Lt SLRA c	1.5	0.95 – 2.37	0.085	1.27	0.82 – 1.97	0.283
Rt DFA c	1.17	0.82 – 1.66	0.393	1.56	1.13 – 2.16	0.007
Lt DFA c	0.75	0.53 – 1.07	0.108	0.62	0.45 – 0.86	0.004
HSS Pedi-FABS	0.97	0.95 – 1.00	0.042	0.96	0.94 – 0.99	0.012
AKP : anterior knee pain Rt : right Lt : left
HBD : heel buttock distance SLRA : straight leg raising angle
DFA : dorsiflexion angle of the ankle joint with knee extension
HSS Pedi-FABS : The Hospital for Special Surgery Pediatric Functional Activity Brief Scale
OR : Odds ratio CI : confidence intervals
a: Reference age is 8 years old
b: Reference group is contact group
c: Each Unit of SLRA and DFA is 10 and 5 degrees, respectively
